# Supplementary material for: Mathematical Models for Blood Flow Quantification in Dialysis Access Using Angiography: A Comparative Study
Source: MDPI journal article supplement (doi:10.3390/diagnostics11101771), 2021-09-26
Supplement: s1 [file s1]

## Supplementary Materials

**Citation:** Koirala, N.; McLennan, G. Mathematical models for blood flow quantification in dialysis access using angiography: A comparative study. *Diagnostics* **2021**, *11*, 1771. <https://doi.org/10.3390/diagnostics11101771>

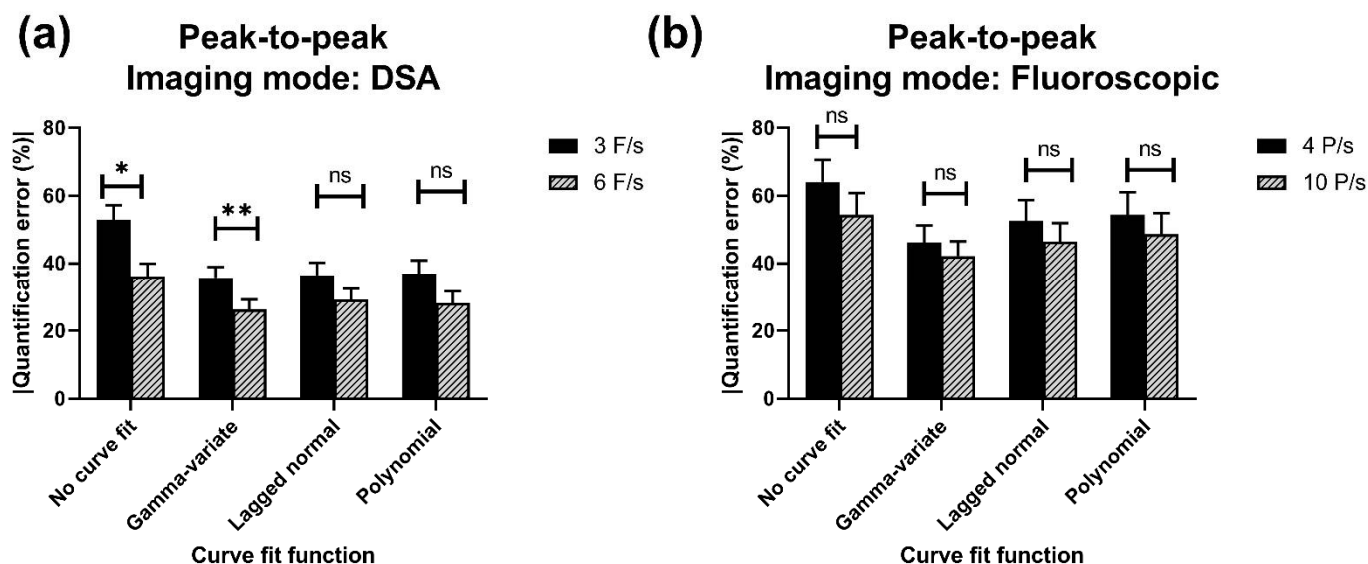

**Figure S1.** Overall quantification error of PP algorithm with different curve-fitting models. Quantification error with (a) DSA acquisition at 3 and 6 F/s, and (b) fluoroscopic imaging at 4 and 10 P/s. \* $-0.008$ , \*\* $-0.025$ , ns—non-significant.

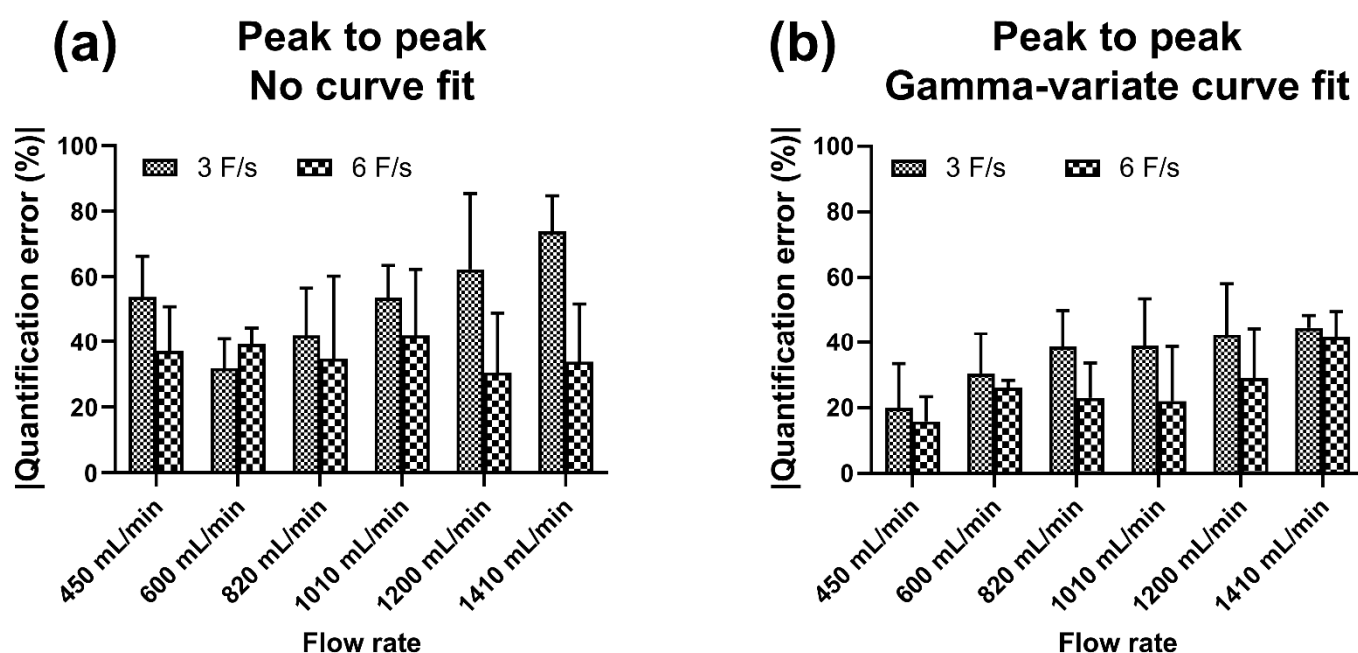

**Figure S2.** Evaluation of quantification accuracy of PP algorithm at different flow rates for DSA acquisition. Absolute quantification error (a) without curve-fit, and (b) with GV curve-fit.

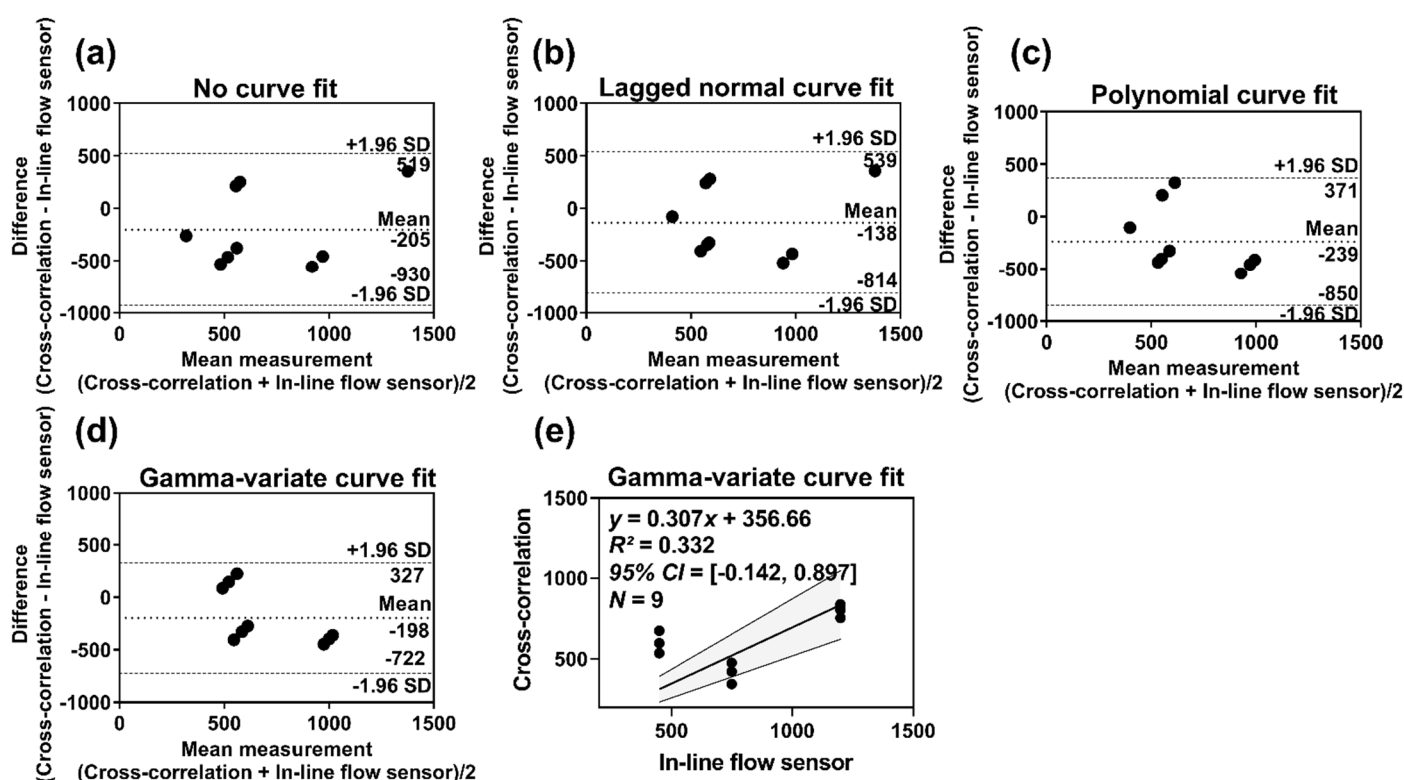

**Figure S3.** (a)–(d) Bland-Altman plots for fluoroscopic imaging showing the bias (mean) and limits of agreement (mean  $\pm$   $1.96 \times$  SD) of CC algorithm with/without curve-fitting versus in-line flow sensor measurement, (e) Scatter plot showing the correlation between measurements obtained with CC algorithm + gamma-variate curve-fit and in-line flow sensor, along with 95% confidence bands of the best-fit line.

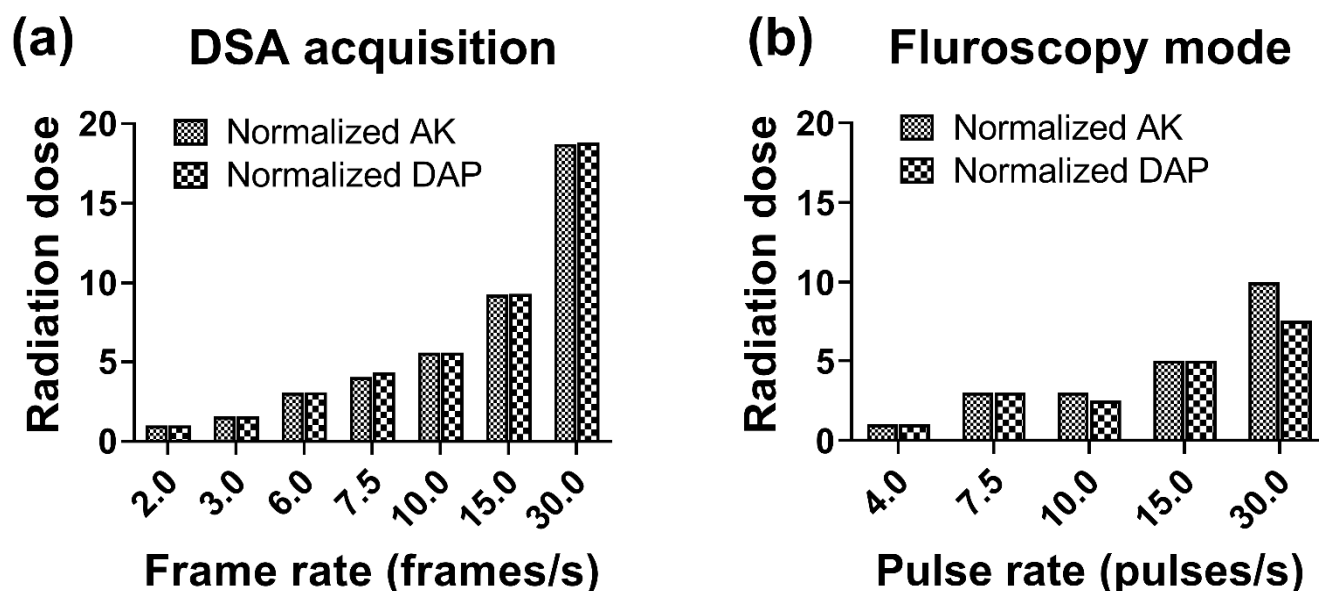

**Figure S4.** Radiation burden for (a) DSA acquisition, and (b) fluoroscopic imaging. The quantities were normalized with the respective radiation dose parameters (AK or DAP) at 2 F/s (DSA) and 4 P/s (Fluoroscopy). The actual dose at 2 F/s (DSA) was 0.158 mGy (AK) and 1.38  $\mu$ Gy.m<sup>2</sup> (DAP); the dose at 4 P/s (fluoroscopy) was 4  $\mu$ Gy (AK) and 0.04  $\mu$ Gy.m<sup>2</sup> (DAP). DSA, Digital subtraction angiography; AK, Air kerma; DAP, Dose area product (also called- Air kerma area product [AKAP]).
